# Supplementary material for: Stellarex Drug-Coated Balloon for Treatment of Femoropopliteal Disease: Twelve-Month Outcomes From the Randomized ILLUMENATE Pivotal and Pharmacokinetic Studies
Source: PubMed Central journal article supplement — Circulation. 2017 Sep 19;136(12):1102–13. doi: 10.1161/CIRCULATIONAHA.117.028893 (PMC5598919; doi:10.1161/circulationaha.117.028893), 2017-09-19
Supplement: cir-136-1102-s001.pdf [file cir-136-1102-s001.pdf]

## SUPPLEMENTAL MATERIAL

## ILLUMENATE Pivotal Investigational Sites and Principal Investigators

| Site                                                                         | Location            | Principal Investigator      |
|------------------------------------------------------------------------------|---------------------|-----------------------------|
| Aurora St. Luke's Medical Center                                             | Milwaukee, WI       | Mark Mewissen, MD           |
| Baptist Hospital of Miami, Inc. and its Miami Cardiac and Vascular Institute | Miami, FL           | Barry Katzen, MD            |
| CAMC Health Education and Research Institute, Inc.                           | Charleston, WV      | Aravinda Nanjundappa, MD    |
| The Cardiac and Vascular Institute Research Foundation, LLC                  | Gainesville, FL     | Matheen A. Khuddus, MD      |
| Cardiac & Vascular Research Center of Northern Michigan                      | Petoskey, MI        | Jason Ricci, MD             |
| Central Iowa Hospital Corporation                                            | Des Moines, IA      | Dennis Fry, MD              |
| The Cleveland Clinic Foundation                                              | Cleveland, OH       | Mehdi Shishehbor, DO        |
| Coastal Vascular and Interventional, PLLC                                    | Pensacola, FL       | Christopher Bosarge, MD     |
| Deborah Heart and Lung Center                                                | Browns Mills, NJ    | Richard Kovach, MD          |
| Edward Hospital                                                              | Naperville, IL      | Mark Goodwin, MD            |
| El Paso Cardiology Associates                                                | El Paso, TX         | Mohammad Laiq Raja, MD      |
| Emory University                                                             | Atlanta, GA         | Khusrow Niazi, MD           |
| Good Samaritan Hospital                                                      | Los Angeles, CA     | Guy Mayeda, MD              |
| Hanusch Krankenhaus Wien                                                     | Wien, Austria       | Martin Werner, MD           |
| Heritage Valley Medical Group, Inc.                                          | Beaver, PA          | Jasvinder Sandhu, MD        |
| Houston Center for Vascular Health                                           | Houston, TX         | Oscar Rosales, MD           |
| Icahn School of Medicine at Mount Sinai                                      | New York, NY        | Peter Faries, MD            |
| Jackson Heart Clinic, P.A.                                                   | Jackson, MS         | William Crowder, MD         |
| Jobst Vascular Institute                                                     | Toledo, OH          | David Paolini, MD           |
| LKH Univ.-Klinikum Graz                                                      | Graz, Austria       | Prof. Dr. Marianne Brodmann |
| Metro Health Hospital                                                        | Wyoming, MI         | Jihad Mustapha, MD          |
| Mission Cardiovascular Research Institute                                    | Fremont, CA         | Ash Jain, MD                |
| Mission Hospital, Inc.                                                       | Asheville, NC       | John Henretta, MD           |
| NC Heart and Vascular Research, LLC                                          | Raleigh, NC         | Pratik Desai, MD            |
| North Carolina (NC) Heart and Vascular Research, LLC                         | Raleigh, NC         | Ravish Sachar, MD           |
| North Ohio Research Ltd                                                      | Elyria, Ohio        | Naim Farhat, MD             |
| Northside Hospital, Inc.                                                     | Atlanta, GA         | Edward Kang, MD             |
| OhioHealth Research Institute                                                | Columbus, OH        | Gary Ansel, MD              |
| Oklahoma Heart Hospital Research Foundation                                  | Oklahoma City, OK   | Mohammad Ghani, MD          |
| Pinnacle Health Cardiovascular Institute, Inc.                               | Harrisburg, PA      | William Bachinsky, MD       |
| Poudre Valley Health Care, Inc.                                              | Fort Collins, CO    | William Miller, MD          |
| Premier Surgical Associates, PLLC                                            | Knoxville, TN       | Christopher Pollock, MD     |
| Providence St. Vincent Medical Center                                        | Portland, OR        | Ethan Korngold, MD          |
| The Rector and Visitors of the University of Virginia                        | Charlottesville, VA | John F. Angle, MD           |
| Sanford Research/ University of South Dakota (USD)                           | Sioux Falls, SD     | Greg Schultz, MD            |
| Sentara Vascular Specialists                                                 | Norfolk, VA         | Todd Gensler, MD            |
| St. Joseph's Hospital                                                        | Fort Wayne, IN      | Louis Lopez, MD             |
| Texas Health Research & Education Institute                                  | Arlington, TX       | James Park, MD              |
| University of Pittsburgh Medical Center (UPMC)                               | Pittsburgh, PA      | Georges Al-Khoury, MD       |
| University Surgical Associates                                               | Chattanooga, TN     | Charles Joels, MD           |
| Wellmont CVA Heart Institute                                                 | Kingsport, TN       | Christopher Metzger, MD     |
| Yale University                                                              | New Haven, CT       | Carlos Mena-Hurtado, MD     |
| Yuma Regional Medical Center                                                 | Yuma, AZ            | Joseph Cardenas, MD         |
